# Supplementary material for: Identification of multi-concentration aromatic fragrances with electronic nose technology using a support vector machine
Source: Royal Society of Chemistry journal article supplement (doi:10.1039/d1ay00788b), 2021-01-01
Supplement: d1ay00788b1.pdf [file d1ay00788b1.pdf]

## Supplementary materials

In order to highlight the difference in the response of each sensor to different samples, each axis in Fig S1 sets the range according to their respective maximum and minimum values.

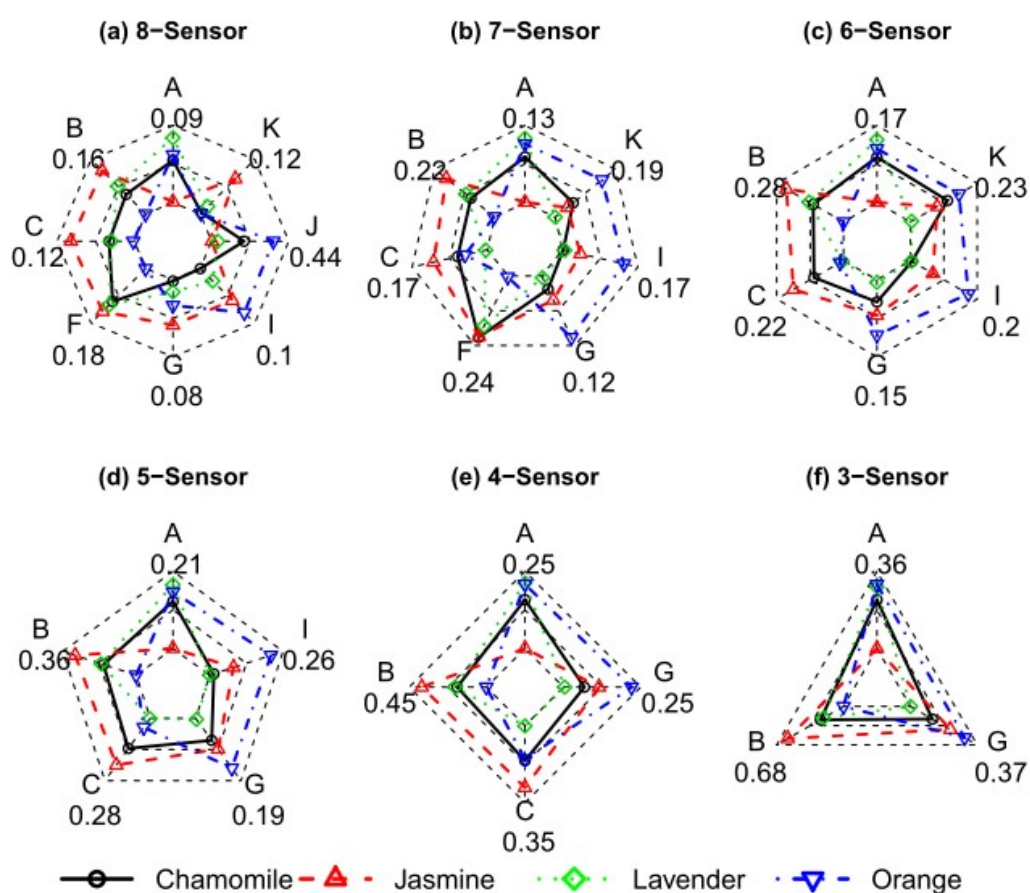

Fig S1 Radar chart of the normalized maximum response intensity to four aromas by arrays with different sensor numbers (with different axis ranges). (a) original array with all 8 sensors; (b) 7-sensor array without sensor J; (c) 6-sensor array without sensor J&F; (d) 5-sensor array without sensor J, F&K; (e) 4-sensor array with sensor A, B, C&G; (f) 3-sensor array with sensor A, B&G.
